# Supplementary material for: Two ways to improve myoelectric control for a transhumeral amputee after targeted muscle reinnervation: a case study
Source: Springer Nature journal article supplement (doi:10.1186/s12984-018-0376-9), 2018-05-10
Supplement: MOESM1 [file 15754928]

Table 1. Action Research Arm Test Scoring Sheet in Control Condition

| Item                                                            | Score   |         |         |
|-----------------------------------------------------------------|---------|---------|---------|
|                                                                 | Trial 1 | Trial 2 | Trial 3 |
| Block, 2.5cm <sup>3</sup>                                       | 2       | 1       | 1       |
| Block, 5.0cm <sup>3</sup>                                       | 2       | 1       | 2       |
| Block, 7.5cm <sup>3</sup>                                       | 1       | 1       | 1       |
| Cricket ball                                                    | 1       | 1       | 1       |
| Sharpening stone                                                | 1       | 2       | 2       |
| Pour water from one glass to another                            | 1       | 0       | 1       |
| Displace 2.25-cm alloy tube from one side of table to the other | 2       | 0       | 1       |
| Displace 1-cm alloy tube from one side of table to the other    | 1       | 1       | 1       |

Table 2. Action Research Arm Test Scoring Sheet in L3 Condition

| Item                                                            | Score   |         |         |
|-----------------------------------------------------------------|---------|---------|---------|
|                                                                 | Trial 1 | Trial 2 | Trial 3 |
| Block, 2.5cm <sup>3</sup>                                       | 2       | 1       | 2       |
| Block, 5.0cm <sup>3</sup>                                       | 2       | 2       | 2       |
| Block, 7.5cm <sup>3</sup>                                       | 1       | 1       | 1       |
| Cricket ball                                                    | 1       | 2       | 2       |
| Sharpening stone                                                | 2       | 2       | 1       |
| Pour water from one glass to another                            | 1       | 1       | 1       |
| Displace 2.25-cm alloy tube from one side of table to the other | 1       | 1       | 1       |
| Displace 1-cm alloy tube from one side of table to the other    | 1       | 1       | 1       |

Table 3. Action Research Arm Test Scoring Sheet in L5 Condition

| Item                                                            | Score   |         |         |
|-----------------------------------------------------------------|---------|---------|---------|
|                                                                 | Trial 1 | Trial 2 | Trial 3 |
| Block, 2.5cm <sup>3</sup>                                       | 1       | 1       | 2       |
| Block, 5.0cm <sup>3</sup>                                       | 2       | 2       | 2       |
| Block, 7.5cm <sup>3</sup>                                       | 1       | 1       | 1       |
| Cricket ball                                                    | 2       | 0       | 2       |
| Sharpening stone                                                | 2       | 2       | 1       |
| Pour water from one glass to another                            | 2       | 1       | 1       |
| Displace 2.25-cm alloy tube from one side of table to the other | 1       | 2       | 1       |
| Displace 1-cm alloy tube from one side of table to the other    | 1       | 1       | 1       |

Table 4. Action Research Arm Test Scoring Sheet in L10 Condition

| Item                                                            | Score   |         |         |
|-----------------------------------------------------------------|---------|---------|---------|
|                                                                 | Trial 1 | Trial 2 | Trial 3 |
| Block, 2.5cm <sup>3</sup>                                       | 2       | 2       | 2       |
| Block, 5.0cm <sup>3</sup>                                       | 2       | 2       | 1       |
| Block, 7.5cm <sup>3</sup>                                       | 2       | 2       | 2       |
| Cricket ball                                                    | 2       | 2       | 2       |
| Sharpening stone                                                | 1       | 1       | 1       |
| Pour water from one glass to another                            | 1       | 1       | 1       |
| Displace 2.25-cm alloy tube from one side of table to the other | 1       | 1       | 2       |
| Displace 1-cm alloy tube from one side of table to the other    | 1       | 1       | 1       |

Table 5. Action Research Arm Test Scoring Sheet in LT Condition

| Item                                                            | Score   |         |         |
|-----------------------------------------------------------------|---------|---------|---------|
|                                                                 | Trial 1 | Trial 2 | Trial 3 |
| Block, 2.5cm <sup>3</sup>                                       | 2       | 2       | 2       |
| Block, 5.0cm <sup>3</sup>                                       | 2       | 2       | 1       |
| Block, 7.5cm <sup>3</sup>                                       | 2       | 2       | 2       |
| Cricket ball                                                    | 2       | 2       | 2       |
| Sharpening stone                                                | 2       | 2       | 2       |
| Pour water from one glass to another                            | 2       | 2       | 1       |
| Displace 2.25-cm alloy tube from one side of table to the other | 2       | 2       | 1       |
| Displace 1-cm alloy tube from one side of table to the other    | 1       | 1       | 2       |

Table 6. Action Research Arm Test Scoring Sheet in MT Condition

| Item                                                            | Score   |         |         |
|-----------------------------------------------------------------|---------|---------|---------|
|                                                                 | Trial 1 | Trial 2 | Trial 3 |
| Block, 2.5cm <sup>3</sup>                                       | 2       | 2       | 2       |
| Block, 5.0cm <sup>3</sup>                                       | 2       | 2       | 2       |
| Block, 7.5cm <sup>3</sup>                                       | 2       | 2       | 2       |
| Cricket ball                                                    | 2       | 2       | 2       |
| Sharpening stone                                                | 2       | 2       | 2       |
| Pour water from one glass to another                            | 2       | 2       | 2       |
| Displace 2.25-cm alloy tube from one side of table to the other | 2       | 2       | 2       |
| Displace 1-cm alloy tube from one side of table to the other    | 2       | 2       | 2       |

Table 7. Action Research Arm Test Scoring Sheet in HT Condition

| Item                                                            | Score   |         |         |
|-----------------------------------------------------------------|---------|---------|---------|
|                                                                 | Trial 1 | Trial 2 | Trial 3 |
| Block, 2.5cm <sup>3</sup>                                       | 2       | 2       | 2       |
| Block, 5.0cm <sup>3</sup>                                       | 2       | 2       | 2       |
| Block, 7.5cm <sup>3</sup>                                       | 2       | 2       | 2       |
| Cricket ball                                                    | 2       | 2       | 2       |
| Sharpening stone                                                | 2       | 2       | 2       |
| Pour water from one glass to another                            | 2       | 1       | 1       |
| Displace 2.25-cm alloy tube from one side of table to the other | 2       | 2       | 2       |
| Displace 1-cm alloy tube from one side of table to the other    | 1       | 1       | 2       |
